# Supplementary material for: MicroRNA profiling of the pubertal mouse mammary gland identifies miR-184 as a candidate breast tumour suppressor gene
Source: Springer Nature journal article supplement (doi:10.1186/s13058-015-0593-0), 2015-06-12
Supplement: MOESM2 [file 9781476]

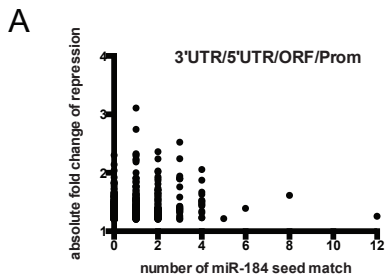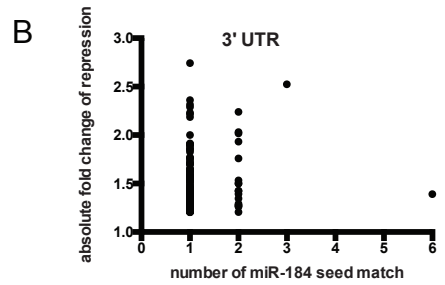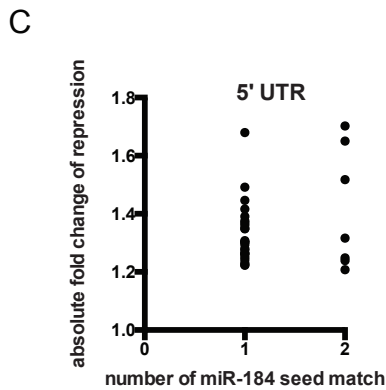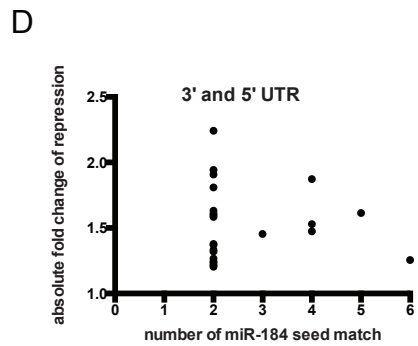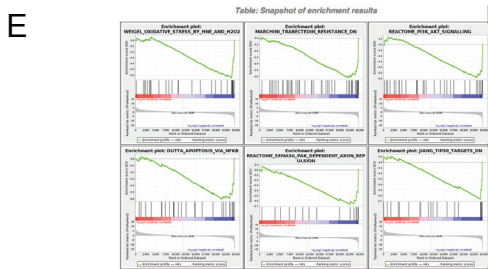

| Enrichment plot                              | NES   | FDR Q-VALUE |
|----------------------------------------------|-------|-------------|
| WEIGEL_OXIDATIVE_STRESS_BY_HNE_AND_H2O2      | -2.20 | 0.009       |
| MARCHINI TRABECTEDIN_RESISTANCE_DN           | -2.12 | 0.022       |
| REACTOME_PI3K_AKT_SIGNALLING                 | -2.04 | 0.041       |
| DUTTA_APOPTOSIS_VIA_NFKB                     | -2.04 | 0.033       |
| REACTOME_SEMA3A_PAK_DEPENDENT_AXON_REPULSION | -2.03 | 0.028       |
| JIANG_TIP30_TARGETS_DN                       | -2.03 | 0.024       |
| SNIDERS_AMPLIFIED_IN_HEAD_AND_NECK_TUMOURS   | -2.02 | 0.023       |
| WONG_ENDMETRIUM_CANCER_UP                    | -1.98 | 0.037       |
| BENPORATH_ES_CORE_NINE_CORRELATED            | -1.96 | 0.041       |
