# Supplementary material for: MicroRNA profiling of the pubertal mouse mammary gland identifies miR-184 as a candidate breast tumour suppressor gene
Source: Springer Nature journal article supplement (doi:10.1186/s13058-015-0593-0), 2015-06-12
Supplement: MOESM3 [file 9781476]

| Gene symbol | Core enrichment |
|-------------|-----------------|
| PIK3CB      | No              |
| GSK3B       | No              |
| RICTOR      | No              |
| CASP9       | No              |
| NTRK1       | No              |
| PIK3R1      | No              |
| CDKN1B      | No              |
| PDPK1       | No              |
| AKT3        | No              |
| CDKN1A      | No              |
| MTOR        | No              |
| CREB1       | No              |
| PTEN        | No              |
| CHUK        | No              |
| BAD         | No              |
| PHLPP1      | No              |
| FOXO4       | No              |
| FOXO3       | No              |
| NGF         | No              |
| NR4A1       | No              |
| AKT1        | No              |
| RHOA        | No              |
| MLST8       | No              |
| THEM4       | No              |
| FOXO1       | No              |
| TRIB3       | No              |
| IRS2        | Yes             |
| MAPKAP1     | Yes             |
| IRS1        | Yes             |
| PIK3CA      | Yes             |
| PIK3R2      | Yes             |
| TSC2        | Yes             |
| MDM2        | Yes             |
| RPS6KB2     | Yes             |
| AKT1S1      | Yes             |
| GSK3A       | Yes             |
| AKT2        | Yes             |
