# Supplementary material for: MicroRNA profiling of the pubertal mouse mammary gland identifies miR-184 as a candidate breast tumour suppressor gene
Source: Springer Nature journal article supplement (doi:10.1186/s13058-015-0593-0), 2015-06-12

A

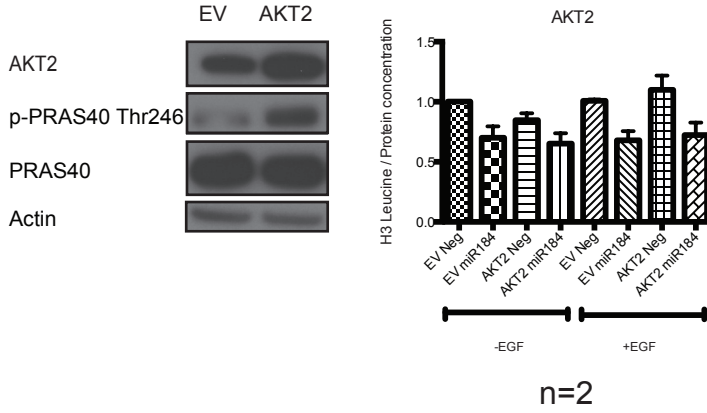

B

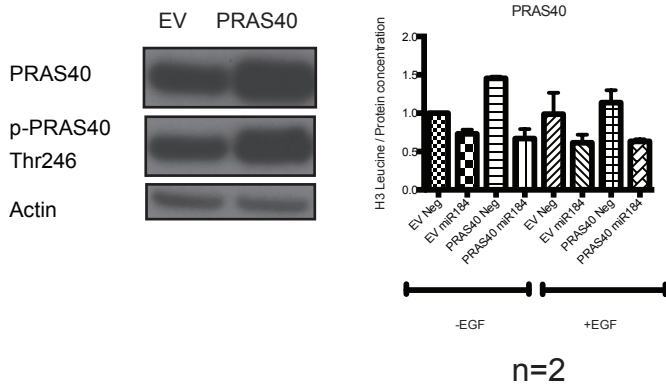

C

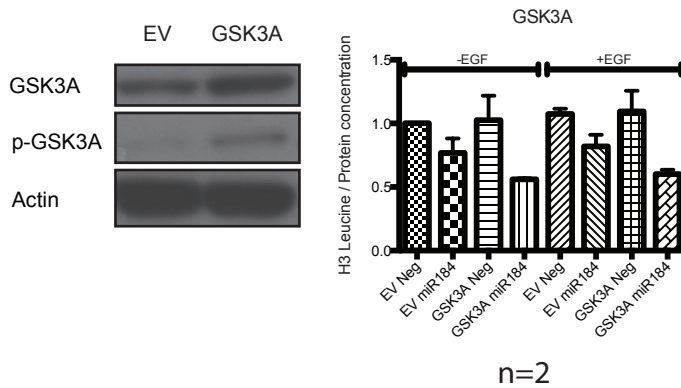

Supplement: MOESM5 [file 9781476]
