# Supplementary material for: MicroRNA profiling of the pubertal mouse mammary gland identifies miR-184 as a candidate breast tumour suppressor gene
Source: Springer Nature journal article supplement (doi:10.1186/s13058-015-0593-0), 2015-06-12
Supplement: MOESM7 [file 9781476]

### Hatzisetal Cohort

Table S2A Unitivariate analysis of prognostic association for mir184 signature

| <b>Model 1 (Predictors: mir184 signature)</b> | <b>Hazard Ratio (95% CI)</b> | <b>P-value</b> |
|-----------------------------------------------|------------------------------|----------------|
| mir184 signature high vs mir184 signature low | 1.581 (1.062, 2.353)         | <b>0.024</b>   |

Table S2B Multivariate analysis of prognostic associations for mir184 signature and ER status

| <b>Model 2 (Predictors: mir184 signature and ER status)</b> | <b>Hazard Ratio (95% CI)</b> | <b>P-value</b>  |
|-------------------------------------------------------------|------------------------------|-----------------|
| mir184 signature high vs mir184 signature low               | 1.175 (0.777, 1.777)         | 0.445           |
| ER IHC positive vs ER IHC negative                          | 0.357 (0.240, 0.532)         | <b>3.86E-07</b> |

### METABRIC Discovery Cohort

Table S2C Unitivariate analysis of prognostic association for mir184 signature

| <b>Model 3 (Predictors: mir184 signature)</b> | <b>Hazard Ratio (95% CI)</b> | <b>P-value</b> |
|-----------------------------------------------|------------------------------|----------------|
| mir184 signature high vs mir184 signature low | 1.350 (1.098, 1.659)         | <b>0.0044</b>  |

Table S2D Multivariate analysis of prognostic associations for mir184 signature and ER status

| <b>Model 4 (Predictors: mir184 signature and ER status)</b> | <b>Hazard Ratio (95% CI)</b> | <b>P-value</b> |
|-------------------------------------------------------------|------------------------------|----------------|
| mir184 signature high vs mir184 signature low               | 1.294 (1.050, 1.595)         | <b>0.016</b>   |
| ER IHC positive vs ER IHC negative                          | 0.731 (0.583, 0.917)         | <b>0.0068</b>  |

### METABRIC Validation Cohort

Table S2E Unitivariate analysis of prognostic association for mir184 signature

| <b>Model 5 (Predictors: mir184 signature)</b> | <b>Hazard Ratio (95% CI)</b> | <b>P-value</b> |
|-----------------------------------------------|------------------------------|----------------|
| mir184 signature high vs mir184 signature low | 1.341 (1.092, 1.648)         | <b>0.0052</b>  |

Table S2F Multivariate analysis of prognostic associations for mir184 signature and ER status

| <b>Model 6 (Predictors: mir184 signature and ER status)</b> | <b>Hazard Ratio (95% CI)</b> | <b>P-value</b> |
|-------------------------------------------------------------|------------------------------|----------------|
| mir184 signature high vs mir184 signature low               | 1.319 (1.043, 1.668)         | <b>0.021</b>   |
| ER IHC positive vs ER IHC negative                          | 0.935 (0.737, 1.185)         | 0.58           |
